# Supplementary material
Source: Research Square preprint supplement (doi:10.21203/rs.3.rs-9038889/v1)
Supplement: Supplementary file 1 [file d6a6bf5d23c2bcaf8d9c6b94.docx]

**Survey on Health Status and Use of Smart Devices Among Older Adults in Xuzhou Communities**

Grandpa, Grandma (Uncle, Aunt): Hello! I am a graduate student at Xuzhou Medical University, conducting a survey on older adults’ use of smart devices and their health status. This study aims to understand how older adults use smart devices and their health conditions, in order to explore how smart devices can provide better services and promote healthy aging. This questionnaire takes about 10 minutes. Your participation is important for improving age-friendly digital health services! The questions do not involve personal privacy, and all information will only be used for academic research. Please answer according to your actual situation. Thank you very much for your support and cooperation!

Investigator name: ______

Survey date: ______

Survey location: ______ community

**I. Basic Information of Older Adults (Collect only basic information about residence, health, insurance, etc., not your personal identity)**

1. Gender: ① Male ② Female
2. Age: ______ years
3. Marital status: ① Married ② Unmarried
4. People who can help you when you are sick or have difficulty moving: ① NO ② Yes
5. Your monthly disposable income: ______ CNY (fill in integer)
6. Your healthcare expenditure in the past year (your own spending, excluding insurance reimbursement): ______ CNY (approximate, fill in integer)
7. Type of basic medical insurance: ① Urban Employee Basic Medical Insurance ② Urban and Rural Resident Basic Medical Insurance ③ Uninsured
8. Are you enrolled in pension insurance? ① Enrolled ② Not enrolled
9. Have you been diagnosed with chronic diseases by a doctor? ① No ② Yes
10. Do you take medication regularly? ① No ② Yes
11. Self-rated health status—How is your current health? ① Poor ② Fair ③ Good
12. Are you satisfied with your current life? ① Dissatisfied ② Neutral ③ Satisfied

**II. Activities of Daily Living (ADL)**

1. ADL—Eating: ① Independent ② Partially self-care ③ Fully dependent
2. ADL—Dressing: ① Independent ② Partially self-care ③ Fully dependent
3. ADL—Bathing: ① Independent ② Partially self-care ③ Fully dependent
4. ADL—Using the toilet: ① Independent ② Partially self-care ③ Fully dependent
5. ADL—Mobility (getting on/off bed or chair): ① Independent ② Partially self-care ③ Fully dependent
6. ADL—Incontinence (urination/defecation): ① Never ② Occasionally ③ Frequently

**III. Health Self-Management Ability**

**Health self-management behaviors (Rate your attention and practice of your own health management, 1 = lowest, 5 = highest)**

① Never (1) ② Occasionally (2) ③ Sometimes (3) ④ Often (4) ⑤ Always (5)

1. ① ② ③ ④ ⑤ Eat three regular meals daily.
2. ① ② ③ ④ ⑤ Eat a light diet.
3. ① ② ③ ④ ⑤ Allocate breakfast, lunch, and dinner reasonably (good breakfast, sufficient lunch, light dinner).
4. ① ② ③ ④ ⑤ Pay attention to nutritional balance of different types of food (staple food, fruits, vegetables, meat, eggs).
5. ① ② ③ ④ ⑤ Drink at least 1200 ml of water daily (about two bottles of mineral water).
6. ① ② ③ ④ ⑤ Choose exercise types and control intensity and duration according to personal condition or professional advice.
7. ① ② ③ ④ ⑤ Make full use of places and equipment for exercise and rest.
8. ① ② ③ ④ ⑤ Exercise at least 3 times a week, each for at least 30 minutes.
9. ① ② ③ ④ ⑤ Regularly engage in aerobic exercise (e.g., jogging, walking, tai chi, swimming, cycling, ball games).
10. ① ② ③ ④ ⑤ Replenish water or electrolytes appropriately after exercise.
11. ① ② ③ ④ ⑤ Pay attention to the validity period and instructions when taking medicine.
12. ① ② ③ ④ ⑤ Visit a hospital promptly when you feel unwell.
13. ① ② ③ ④ ⑤ Actively cooperate with medical staff during consultations.
14. ① ② ③ ④ ⑤ Explain your condition clearly to doctors.

**Health self-management environment**

① Never (1) ② Occasionally (2) ③ Sometimes (3) ④ Often (4) ⑤ Always (5)

1. ① ② ③ ④ ⑤ Regularly clean and disinfect household items or equipment.
2. ① ② ③ ④ ⑤ Keep your work or living environment tidy and clean.
3. ① ② ③ ④ ⑤ Pay attention to food hygiene and safety.
4. ① ② ③ ④ ⑤ Create a good sleep environment (including light, noise, temperature, humidity, etc.).
5. ① ② ③ ④ ⑤ Improve indoor air quality when necessary.
6. ① ② ③ ④ ⑤ Understand or use relevant medical insurance (e.g., reimbursement ratio, covered drugs, coverage items).
7. ① ② ③ ④ ⑤ Follow or use medical-related policies (e.g., new medical reform policies).
8. ① ② ③ ④ ⑤ Appropriately use available medical and health services (e.g., choose suitable medical institutions).
9. ① ② ③ ④ ⑤ Seek help and support from others when needed.
10. ① ② ③ ④ ⑤ Apply the health knowledge you have learned.

**Health self-management cognition (Rate the role and importance of the following aspects for your health, 1 = strongly disagree, 5 = strongly agree)**

① Strongly disagree (1) ② Somewhat disagree (2) ③ Unsure (3) ④ Somewhat agree (4) ⑤ Strongly agree (5)

1. ① ② ③ ④ ⑤ Good interpersonal relationships benefit health.
2. ① ② ③ ④ ⑤ A good living or working environment promotes health.
3. ① ② ③ ④ ⑤ Family or friends supervise your health management.
4. ① ② ③ ④ ⑤ Family or friends serve as role models in your health management.
5. ① ② ③ ④ ⑤ Vaccination is an economical and effective measure to prevent certain infectious diseases.
6. ① ② ③ ④ ⑤ Proper use of health products or equipment can alleviate illness or improve health to some extent.
7. ① ② ③ ④ ⑤ Following medical advice is beneficial to health.
8. ① ② ③ ④ ⑤ Diet, exercise, and mental health are important factors affecting health.
9. ① ② ③ ④ ⑤ Less smoking, more exercise, and balanced diet can reduce cardiovascular disease.

**(Rate your ability and confidence in the following 5 aspects, 1 = no confidence, 5 = full confidence)**

① No confidence (1) ② Slightly confident (2) ③ Not sure (3) ④ Moderately confident (4) ⑤ Full confidence (5)

1. ① ② ③ ④ ⑤ Follow the treatment plan or advice of medical staff.
2. ① ② ③ ④ ⑤ Control yourself well and resist the influence of others’ unhealthy habits.
3. ① ② ③ ④ ⑤ Change unhealthy lifestyle and practice self-care behaviors.
4. ① ② ③ ④ ⑤ Respond correctly to health problems.
5. ① ② ③ ④ ⑤ Identify behaviors, activities, or things harmful to health.

**IV. eHealth Literacy (Evaluate your ability to obtain and assess health information online, 1 = lowest, 5 = highest)**

① Strongly disagree (1) ② Somewhat disagree (2) ③ Unsure (3) ④ Somewhat agree (4) ⑤ Strongly agree (5)

1. ① ② ③ ④ ⑤ I know how to search for useful health information online.
2. ① ② ③ ④ ⑤ I know how to use the internet to answer my health questions.
3. ① ② ③ ④ ⑤ I know what health information can be obtained online.
4. ① ② ③ ④ ⑤ I know where to find useful health information online.
5. ① ② ③ ④ ⑤ I know how to use obtained online health information to help myself.
6. ① ② ③ ④ ⑤ I have the skills to evaluate the quality of online health information.
7. ① ② ③ ④ ⑤ I can distinguish between high-quality and low-quality health information online.
8. ① ② ③ ④ ⑤ I am confident in making health-related decisions using online information.

**V.** **Digital Health-Related Situation (Including Use and Awareness of Smart Devices and Digital Health Services)**

1. Daily time spent using a smartphone to follow health information: ______ hours
2. How proficient are you in using a smartphone? ① Not proficient ② Average ③ Proficient
3. Frequency of using digital health services: ① Daily ② Not daily
4. Your awareness of digital health services: ① Low awareness ② Moderate awareness ③ High awareness

**This concludes the questionnaire. Thank you very much for your cooperation!**
